# Supplementary material for: Association of 1-Year Blood Pressure Variability With Long-term Mortality Among Adults With Coronary Artery Disease: A Post Hoc Analysis of a Randomized Clinical Trial
Source: PubMed Central journal article supplement (PMC8085725; doi:10.1001/jamanetworkopen.2021.8418), 2021-04-29
Supplement: jamanetwopen-e218418-s001.pdf [file jamanetwopen-e218418-s001.pdf]

## Supplementary Online Content

Dasa O, Smith SM, Howard G, et al. Association of 1-year blood pressure variability with long-term mortality among adults with coronary artery disease: a post hoc analysis of a randomized clinical trial. *JAMA Netw Open*. 2021;4(4):e218418. doi:10.1001/jamanetworkopen.2021.8418

**eTable 1.** Original INVEST Study Baseline Characteristics

**eTable 2.** Pearson's Correlation Coefficients for SBP Variability Measure

**eTable 3.** Pearson's Correlation Coefficients for DBP Variability Measures

**eTable 4.** Hazard Ratios and 95% Confidence Intervals for All-Cause Mortality in Males

**eTable 5.** Hazard Ratios and 95% Confidence Intervals for All-Cause Mortality in Females

**eTable 6.** Hazard Ratios and 95% Confidence Intervals for All-Cause Mortality in the Calcium Channel Blocker Arm

**eTable 7.** Hazard Ratios and 95% Confidence Intervals for All-Cause Mortality in the Beta-Blocker Arm

**eTable 8.** Pertinent Baseline Patient Characteristics Across Quintiles of VIM

**eTable 9.** Pertinent Baseline Patient Characteristics Across Quintiles of ARV

**eTable 10.** Pertinent Baseline Patient Characteristics Across Quintiles of CV

**eTable 11.** Pertinent Baseline Patient Characteristics Across Quintiles of SD

**eTable 12.** Cochran-Armitage Test for Trend Across Blood Pressure Variability Quintiles

**eBox.** Blood Pressure Variability Equations

**eFigure 1.** Study Timeline

**eFigure 2.** Spline Curves of Systolic Blood Pressure Variability Measures on Primary Outcome

**eFigure 3.** Spline Curves of Diastolic Blood Pressure Variability Measures on Primary Outcome

**eFigure 4.** Schematic Diagram of Implementing BP Variability Calculation in Clinical Practice

This supplementary material has been provided by the authors to give readers additional information about their work.

**eTable 1. Original INVEST Study Baseline Characteristics**

| Characteristic*                              | Calcium Antagonist Strategy (n=11,267) | Non-Calcium Antagonist Strategy (n=11,309) |
|----------------------------------------------|----------------------------------------|--------------------------------------------|
| <b>Age, years</b>                            | 66.0 (9.7)                             | 66.1 (9.8)                                 |
| <b>Female sex</b>                            | 5850 (51.9)                            | 5920 (52.3)                                |
| <b>BMI, Kg/m<sup>2</sup></b>                 | 29.1 (6.8)                             | 29.2 (7.4)                                 |
| <b>Race/Ethnicity</b>                        |                                        |                                            |
| White                                        | 5466 (48.5)                            | 5459 (48.3)                                |
| Black                                        | 1506 (13.4)                            | 1523 (13.5)                                |
| Hispanic                                     | 4021 (35.7)                            | 4024 (35.6)                                |
| Asian                                        | 63 (0.6)                               | 86 (0.8)                                   |
| Other                                        | 211 (1.9)                              | 217 (1.9)                                  |
| <b>History of:</b>                           |                                        |                                            |
| Myocardial infarction <sup>†</sup>           | 3622 (32.1)                            | 3596 (31.8)                                |
| Heart failure                                | 619 (5.5)                              | 637 (5.6)                                  |
| Coronary Revascularization (CABG and/or PCI) | 3079 (27.3)                            | 3087(27.3)                                 |
| Left ventricular hypertrophy                 | 2422 (21.5)                            | 2526 (22.3)                                |
| Stroke or TIA                                | 595 (5.3)                              | 567 (5.0)                                  |
| Peripheral vascular disease                  | 1345 (11.9)                            | 1354 (12.0)                                |
| Diabetes mellitus <sup>‡</sup>               | 3169 (28.1)                            | 3231 (28.6)                                |
| Hypercholesterolemia <sup>‡</sup>            | 6300 (55.9)                            | 6293 (55.6)                                |
| Renal insufficiency <sup>§</sup>             | 214 (1.9)                              | 210 (1.9)                                  |
| <b>Past smoker</b>                           | 5247 (46.6)                            | 5207 (46.0)                                |
| <b>Current smoker</b>                        | 1435 (12.7)                            | 1374 (12.0)                                |

eTable 1 was adopted from the original INVEST trial publication (JAMA. 2003;290(21):2805-2816).

\*Data are expressed as mean ± SD or n (%) unless otherwise indicated.

<sup>†</sup>Remote confirmed MI (≥3 months prior to enrollment).

<sup>‡</sup>History of or currently taking antidiabetic or lipid-lowering medication.

<sup>§</sup>History of or currently have elevated serum creatinine level but less than 4 mg/dl.

Abbreviations. BMI, body mass index; n, number; CABG, coronary artery bypass surgery; INVEST, the international verapamil-trandolapril study; SD, standard deviation; TIA, transient ischemic attack.

**eTable 2.** Pearson’s Correlation Coefficients for SBP Variability Measure

|            | <b>MBP</b>      | <b>SD</b>      | <b>CV</b>      | <b>VIM</b>     | <b>ARV</b>     |
|------------|-----------------|----------------|----------------|----------------|----------------|
| <b>MBP</b> | 1.00            | 0.289 (<.0001) | 0.112 (<.0001) | 0.016 (0.0229) | 0.314 (<.0001) |
| <b>SD</b>  | 0.289 (<.0001)  | 1.00           | 0.979 (<.0001) | 0.951 (<.0001) | 0.846 (<.0001) |
| <b>CV</b>  | 0.112 (<.0001)  | 0.979 (<.0001) | 1.00           | 0.994 (<.0001) | 0.808 (<.0001) |
| <b>VIM</b> | 0.016 (0.0229 ) | 0.951 (<.0001) | 0.994 (<.0001) | 1.00           | 0.775 (<.0001) |
| <b>ARV</b> | 0.313 (<.0001)  | 0.846 (<.0001) | 0.808 (<.0001) | 0.775 (<.0001) | 1.00           |

Correlation matrix for SBP variability measures. Numbers are expressed as “r” (P-value).

Abbreviations. ARV, average real variability; CV, coefficient of variation; SBP, systolic blood pressure; MBP, mean blood pressure; SD, standard deviation; VIM, variability independent of the mean.

**eTable 3.** Pearson’s Correlation Coefficients for DBP Variability Measures

|            | <b>MBP</b>      | <b>SD</b>      | <b>CV</b>      | <b>VIM</b>     | <b>ARV</b>     |
|------------|-----------------|----------------|----------------|----------------|----------------|
| <b>MBP</b> | 1.00            | 0.200 (<.0001) | 0.001 (0.8617) | -0.021 (0.002) | 0.187 (<.0001) |
| <b>SD</b>  | 0.200 (<.0001)  | 1.00 (<.0001)  | 0.974 (<.0001) | 0.968 (<.0001) | 0.845 (<.0001) |
| <b>CV</b>  | 0.001 (0.862)   | 0.974 (<.0001) | 1.00           | 0.999 (<.0001) | 0.816 (<.0001) |
| <b>VIM</b> | -0.021 (0.0020) | 0.968 (<.0001) | 0.999 (<.0001) | 1.00           | 0.810 (<.0001) |
| <b>ARV</b> | 0.187 (<.0001)  | 0.845 (<.0001) | 0.816 (<.0001) | 0.810 (<.0001) | 1.00           |

Correlation matrix for DBP variability measures. Numbers are expressed as “r” (P-value).

Abbreviations. ARV, average real variability; CV, coefficient of variation; DBP, diastolic blood pressure; MBP, mean blood pressure; SD, standard deviation; VIM, variability independent of the mean.

**eTable 4.** Hazard Ratios and 95% Confidence Intervals for All-Cause Mortality in Males

| Quintile | VIM                  |                      | ARV                                |                                    | CV                                 |                      | SD                                 |                                    |
|----------|----------------------|----------------------|------------------------------------|------------------------------------|------------------------------------|----------------------|------------------------------------|------------------------------------|
|          | Crude                | Adjusted             | Crude                              | Adjusted                           | Crude                              | Adjusted             | Crude                              | Adjusted                           |
| Q1       | 1.0<br>(ref)         | 1.0<br>(ref)         | 1.0<br>(ref)                       | 1.0<br>(ref)                       | 1.0<br>(ref)                       | 1.0<br>(ref)         | 1.0<br>(ref)                       | 1.0<br>(ref)                       |
| Q2       | 0.910<br>(0.81-1.03) | 0.918<br>(0.81-1.04) | 1.004<br>(0.89-1.14)               | 0.994<br>(0.88-1.13)               | 0.914<br>(0.81-1.03)               | 0.916<br>(0.81-1.04) | 0.958<br>(0.85-1.08)               | 0.958<br>(0.85-1.08)               |
| Q3       | 0.994<br>(0.88-1.12) | 0.969<br>(0.86-1.09) | 0.988<br>(0.87-1.12)               | 0.933<br>(0.82-1.06)               | 1.022<br>(0.91-1.15)               | 0.992<br>(0.88-1.12) | 1.012<br>(0.90-1.14)               | 0.977<br>(0.87-1.10)               |
| Q4       | 1.079<br>(0.96-1.22) | 1.041<br>(0.92-1.18) | <b>1.379</b><br><b>(1.22-1.56)</b> | <b>1.117</b><br><b>(0.99-1.26)</b> | 1.051<br>(0.93-1.19)               | 1.023<br>(0.91-1.16) | 1.094<br>(0.97-1.24)               | 1.059<br>(0.938-1.20)              |
| Q5       | 1.090<br>(0.96-1.23) | 1.036<br>(0.92-1.17) | <b>1.379</b><br><b>(1.22-1.56)</b> | <b>1.174</b><br><b>(1.04-1.33)</b> | <b>1.190</b><br><b>(1.06-1.34)</b> | 1.096<br>(0.97-1.24) | <b>1.257</b><br><b>(1.11-1.42)</b> | <b>1.130</b><br><b>(1.00-1.28)</b> |

eTable 4 shows results of Cox regression analysis, Hazard Ratios (95% Confidence Intervals), for all-cause mortality comparing higher SBP variability measures in quintiles to the lowest quintile as a reference in Males. Higher quintiles predicted higher mortality. This relationship continued to be significant after adjustment.

Abbreviations. ARV, average real variability; CV, coefficient of variation; ref, reference; SBP, systolic blood pressure; SD, standard deviation; VIM, variability independent of the mean.

**eTable 5.** Hazard Ratios and 95% Confidence Intervals for All-Cause Mortality in Females

| Quintile | VIM                                |                                    | ARV                                |                                    | CV                                  |                                     | SD                                 |                                    |
|----------|------------------------------------|------------------------------------|------------------------------------|------------------------------------|-------------------------------------|-------------------------------------|------------------------------------|------------------------------------|
|          | Crude                              | Adjusted                           | Crude                              | Adjusted                           | Crude                               | Adjusted                            | Crude                              | Adjusted                           |
| Q1       | 1.0<br>(ref)                       | 1.0<br>(ref)                       | 1.0<br>(ref)                       | 1.0<br>(ref)                       | 1.0<br>(ref)                        | 1.0<br>(ref)                        | 1.0<br>(ref)                       | 1.0<br>(ref)                       |
| Q2       | 1.027<br>(0.90-1.17)               | 1.021<br>(0.90-1.16)               | 1.097<br>(0.96-1.26)               | 0.980<br>(0.85-1.12)               | 0.995<br>(0.87-1.14)                | 0.990<br>(0.87-1.13)                | 0.948<br>(0.83-1.09)               | 0.909<br>(0.79-1.04)               |
| Q3       | 1.012<br>(0.89-1.15)               | 0.945<br>(0.83-1.08)               | <b>1.162</b><br><b>(1.01-1.33)</b> | 1.005<br>(0.88-1.15)               | 1.030<br>(0.90-1.18)                | 0.973<br>(0.85-1.11)                | 1.081<br>(0.95-1.23)               | 0.989<br>(0.87-1.13)               |
| Q4       | 1.097<br>(0.97-1.25)               | 1.044<br>(0.92-1.19)               | <b>1.252</b><br><b>(1.10-1.43)</b> | 1.029<br>(0.90-1.18)               | <b>1.135</b><br><b>(1.00-1.290)</b> | <b>1.038</b><br><b>(0.91-1.18)</b>  | <b>1.185</b><br><b>(1.04-1.35)</b> | 1.043<br>(0.92-1.19)               |
| Q5       | <b>1.303</b><br><b>(1.15-1.47)</b> | <b>1.269</b><br><b>(1.12-1.43)</b> | <b>1.757</b><br><b>(1.55-1.99)</b> | <b>1.330</b><br><b>(1.17-1.51)</b> | <b>1.365</b><br><b>(1.21-1.54)</b>  | <b>1.272</b><br><b>(1.13 -1.44)</b> | <b>1.528</b><br><b>(1.35-1.73)</b> | <b>1.274</b><br><b>(1.13-1.44)</b> |

eTable 5 shows results of Cox regression analysis, Hazard Ratios (95% Confidence Intervals), for all-cause mortality comparing higher SBP variability measures in quintiles to the lowest quintile as a reference in Females. Higher quintiles predicted higher mortality in Females stronger than in Males. This relationship continued to be significant after adjustment.

Abbreviations. ARV, average real variability; CV, coefficient of variation; ref, reference; SBP, systolic blood pressure; SD, standard deviation; VIM, variability independent of the mean.

**eTable 6.** Hazard Ratios and 95% Confidence Intervals for All-Cause Mortality in the Calcium Channel Blocker Arm

| Quintile | VIM                               |                                   | ARV                               |                                   | CV                                |                                   | SD                                |                                   |
|----------|-----------------------------------|-----------------------------------|-----------------------------------|-----------------------------------|-----------------------------------|-----------------------------------|-----------------------------------|-----------------------------------|
|          | Crude                             | Adjusted                          | Crude                             | Adjusted                          | Crude                             | Adjusted                          | Crude                             | Adjusted                          |
| Q1       | 1.0<br>(ref)                      | 1.0<br>(ref)                      | 1.0<br>(ref)                      | 1.0<br>(ref)                      | 1.0<br>(ref)                      | 1.0<br>(ref)                      | 1.0<br>(ref)                      | 1.0<br>(ref)                      |
| Q2       | 0.97<br>(0.85-1.10)               | 0.96<br>(0.85-1.09)               | 1.10<br>(0.96-1.25)               | 1.00<br>(0.87-1.13)               | 0.95<br>(0.84-1.08)               | 0.93<br>(0.82-1.05)               | 0.98<br>(0.86-1.11)               | 0.94<br>(0.83-1.07)               |
| Q3       | 1.04<br>(0.92-1.18)               | 0.97<br>(0.86-1.10)               | 1.14<br>(1.00-1.30)               | 1.00<br>(0.87-1.13)               | 1.05<br>(0.92-1.19)               | 1.00<br>(0.87-1.12)               | 1.06<br>(0.94-1.21)               | 0.98<br>(0.87-1.12)               |
| Q4       | <b>1.13</b><br><b>(1.00-1.28)</b> | 1.09<br>(0.96-1.23)               | <b>1.36</b><br><b>(1.20-1.55)</b> | <b>1.15</b><br><b>(1.01-1.30)</b> | <b>1.16</b><br><b>(1.02-1.31)</b> | 1.07<br>(0.95-1.21)               | <b>1.25</b><br><b>(1.11-1.41)</b> | 1.11<br>(0.98-1.26)               |
| Q5       | <b>1.22</b><br><b>(1.08-1.38)</b> | <b>1.15</b><br><b>(1.02-1.30)</b> | <b>1.61</b><br><b>(1.42-1.82)</b> | <b>1.23</b><br><b>(1.08-1.40)</b> | <b>1.30</b><br><b>(1.15-1.47)</b> | <b>1.14</b><br><b>(1.01-1.30)</b> | <b>1.42</b><br><b>(1.25-1.60)</b> | <b>1.15</b><br><b>(1.01-1.31)</b> |

eTable 6 shows results of Cox regression analysis, Hazard Ratios (95% Confidence Intervals), for all-cause mortality comparing higher SBP variability measures in quintiles to the lowest quintile as a reference in the calcium channel blocker arm from the original INVEST trial. Higher quintiles predicted higher mortality. This relationship continued to be significant after adjustment.

Abbreviations. ARV, average real variability; CV, coefficient of variation; ref, reference; SBP, systolic blood pressure; SD, standard deviation; VIM, variability independent of the mean.

**eTable 7.** Hazard Ratios and 95% Confidence Intervals for All-Cause Mortality in the Beta-Blocker Arm

| Quintile | VIM                               |                                   | ARV                               |                                   | CV                                |                                   | SD                                |                                   |
|----------|-----------------------------------|-----------------------------------|-----------------------------------|-----------------------------------|-----------------------------------|-----------------------------------|-----------------------------------|-----------------------------------|
|          | Crude                             | Adjusted                          | Crude                             | Adjusted                          | Crude                             | Adjusted                          | Crude                             | Adjusted                          |
| Q1       | 1.0<br>(ref)                      | 1.0<br>(ref)                      | 1.0<br>(ref)                      | 1.0<br>(ref)                      | 1.0<br>(ref)                      | 1.0<br>(ref)                      | 1.0<br>(ref)                      | 1.0<br>(ref)                      |
| Q2       | 0.96<br>(0.85-1.10)               | 0.98<br>(0.86-1.12)               | 0.99<br>(0.87-1.13)               | 0.97<br>(0.85-1.10)               | 0.95<br>(0.83-1.08)               | 0.97<br>(0.85-1.10)               | 0.92<br>(0.81-1.05)               | 0.93<br>(0.81-1.10)               |
| Q3       | 0.97<br>(0.85-1.10)               | 0.95<br>(0.84-1.08)               | 0.99<br>(0.87-1.13)               | 0.91<br>(0.80-1.04)               | 1.00<br>(0.88-1.14)               | 0.98<br>(0.86-1.11)               | 1.01<br>(0.89-1.15)               | 0.96<br>(0.84-1.10)               |
| Q4       | 1.03<br>(0.91-1.16)               | 1.00<br>(0.88-1.14)               | 1.09<br>(0.96-1.24)               | 0.95<br>(0.84-1.10)               | 1.01<br>(0.89-1.14)               | 0.97<br>(0.85-1.10)               | 1.01<br>(0.89-1.14)               | 0.94<br>(0.83-1.07)               |
| Q5       | <b>1.14</b><br><b>(1.01-1.28)</b> | <b>1.14</b><br><b>(1.01-1.30)</b> | <b>1.45</b><br><b>(1.30-1.64)</b> | <b>1.14</b><br><b>(1.00-1.30)</b> | <b>1.21</b><br><b>(1.08-1.40)</b> | <b>1.15</b><br><b>(1.02-1.30)</b> | <b>1.31</b><br><b>(1.16-1.47)</b> | <b>1.12</b><br><b>(0.99-1.27)</b> |

eTable 7 shows results of Cox regression analysis, Hazard Ratios (95% Confidence Intervals), for all-cause mortality comparing higher SBP variability measures in quintiles to the lowest quintile as a reference in the beta-blocker arm from the original INVEST trial. Higher quintiles predicted higher mortality. This relationship continued to be significant after adjustment.

Abbreviations. ARV, average real variability; CV, coefficient of variation; ref, reference; SBP, systolic blood pressure; SD, standard deviation; VIM, variability independent of the mean.



**eTable 8. Pertinent Baseline Patient Characteristics Across Quintiles of VIM**

| Characteristic*                | VIM Quintiles             |                           |                           |                   |                           | Total             | P-value <sup>†</sup> |
|--------------------------------|---------------------------|---------------------------|---------------------------|-------------------|---------------------------|-------------------|----------------------|
|                                | Q1                        | Q2                        | Q3                        | Q4                | Q5                        |                   |                      |
| <b>N</b>                       | 307<br>2                  | 307<br>3                  | 307<br>3                  | 3073              | 307<br>2                  | 15363             |                      |
| <b>Age, years</b>              | 66.1<br>6<br>(9.7<br>3)   | 66.0<br>0<br>(9.8<br>3)   | 66.3<br>8<br>(10.<br>09)  | 66.77<br>(9.93)   | 67.1<br>6<br>(9.8<br>5)   | 66.53<br>(9.92)   | <.000<br>1           |
| <b>BMI, Kg/m<sup>2</sup></b>   | 29.8<br>2<br>(5.6<br>9)   | 28.9<br>3<br>(5.9<br>7)   | 29.4<br>5<br>(5.6<br>2)   | 29.46<br>(5.74)   | 28.9<br>9<br>(5.9<br>2)   | 29.53<br>(5.84)   | <.000<br>1           |
| <b>Female</b>                  | 160<br>1<br>(19.<br>38)   | 159<br>4<br>(19.<br>29)   | 158<br>5<br>(19.<br>18)   | 1697<br>(20.54)   | 178<br>5<br>(21.<br>6)    | 8262<br>(53.78)   | <.000<br>1           |
| <b>Race</b>                    |                           |                           |                           |                   |                           |                   |                      |
| White                          | 142<br>0<br>(20.<br>41)   | 142<br>6<br>(20.<br>49)   | 141<br>7<br>(20.<br>36)   | 1382<br>(19.86)   | 131<br>4<br>(18.<br>88)   | 6959<br>(45.3)    | 0.015                |
| Black                          | 466<br>(20.<br>1)         | 468<br>(20.<br>19)        | 482<br>(20.<br>79)        | 460<br>(19.84)    | 442<br>(19.<br>07)        | 2318<br>(15.09)   |                      |
| Hispanic                       | 111<br>1<br>(19.<br>64)   | 110<br>6<br>(19.<br>55)   | 109<br>0<br>(19.<br>27)   | 1129<br>(19.96)   | 122<br>1<br>(21.<br>58)   | 5657<br>(36.82)   |                      |
| Other                          | 75<br>(17.<br>48)         | 73<br>(17.<br>02)         | 84<br>(19.<br>58)         | 102<br>(23.78)    | 95<br>(22.<br>14)         | 429<br>(2.79)     |                      |
| <b>Baseline SBP, mm Hg</b>     | 141.<br>34<br>(15.<br>06) | 143.<br>96<br>(15.<br>53) | 147.<br>43<br>(17.<br>23) | 150.47<br>(18.18) | 158.<br>04<br>(22.<br>75) | 148.23<br>(18.90) | <.000<br>1           |
| <b>Baseline DBP, mm Hg</b>     | 87.6<br>3<br>(12.<br>14)  | 85.5<br>0<br>(11.<br>05)  | 84.8<br>1<br>(10.<br>87)  | 84.08<br>(10.41)  | 83.2<br>5<br>(9.8<br>7)   | 85.00<br>(11.05)  | <.000<br>1           |
| <b>Overall Mean SBP, mm Hg</b> | 139.<br>34<br>(14.<br>35) | 138.<br>97<br>(13.<br>32) | 139.<br>42<br>(13.<br>45) | 139.92<br>(13.25) | 140.<br>18<br>(13.<br>93) | 139.57<br>(13.67) | 0.004                |

|                                                 |                         |                         |                         |                 |                         |                 |            |
|-------------------------------------------------|-------------------------|-------------------------|-------------------------|-----------------|-------------------------|-----------------|------------|
| <b>Overall Mean DBP, mm Hg</b>                  | 81.6<br>7<br>(7.4<br>0) | 80.8<br>4<br>(7.5<br>0) | 80.6<br>0<br>(7.8<br>1) | 80.07<br>(7.93) | 78.8<br>6<br>(8.6<br>0) | 80.41<br>(7.91) | <.000<br>1 |
| <b>History of:</b>                              |                         |                         |                         |                 |                         |                 |            |
| Diabetes mellitus                               | 893<br>(19.<br>79)      | 895<br>(19.<br>83)      | 931<br>(20.<br>63)      | 911<br>(20.19)  | 883<br>(19.<br>57)      | 4513<br>(29.38) | 0.70       |
| Hypercholesterolemia                            | 168<br>3<br>(19.<br>49) | 177<br>9<br>(20.<br>61) | 175<br>1<br>(20.<br>28) | 1727<br>(20)    | 169<br>3<br>(19.<br>61) | 8633<br>(56.19) | 0.08       |
| Renal insufficiency                             | 50<br>(16.<br>67)       | 58<br>(19.<br>33)       | 62<br>(20.<br>67)       | 60<br>(20)      | 70<br>(23.<br>33)       | 300<br>(1.95)   | 0.47       |
| Prior MI                                        | 887<br>(20.<br>1)       | 893<br>(20.<br>23)      | 872<br>(19.<br>76)      | 914<br>(20.71)  | 848<br>(19.<br>21)      | 4414<br>(28.73) | 0.43       |
| CHF                                             | 156<br>(20.<br>86)      | 144<br>(19.<br>25)      | 155<br>(20.<br>72)      | 135<br>(18.05)  | 158<br>(21.<br>12)      | 748<br>(4.87)   | 0.61       |
| Coronary Revascularization<br>(CABG and/or PCI) | 909<br>(20.<br>27)      | 978<br>(21.<br>81)      | 914<br>(20.<br>38)      | 870<br>(19.4)   | 813<br>(18.<br>13)      | 4484<br>(29.19) | 0.000<br>1 |
| Evidence of LVH                                 | 471<br>(19.<br>42)      | 462<br>(19.<br>05)      | 489<br>(20.<br>16)      | 495<br>(20.41)  | 508<br>(20.<br>95)      | 2425<br>(15.78) | 0.50       |
| PAD                                             | 325<br>(16.<br>68)      | 356<br>(18.<br>27)      | 410<br>(21.<br>04)      | 429<br>(22.01)  | 429<br>(22.<br>01)      | 1949<br>(12.69) | <.000<br>1 |
| TIA or stroke                                   | 214<br>(19.<br>04)      | 206<br>(18.<br>33)      | 224<br>(19.<br>93)      | 241<br>(21.44)  | 239<br>(21.<br>26)      | 1124<br>(7.32)  | 0.34       |

eTable 8 displays baseline characteristics across quintiles of SBP VIM.

\* Data are expressed as mean (SD) or n (%) unless otherwise indicated. (%) in rows across quintiles represent row percentages. Frequency missing = 1325.

† P-value from Chi-square or ANOVA tests.

1= Lowest (reference) quintile; 5= Highest quintile.

Abbreviations. BMI, body mass index; n, number; CABG, coronary artery bypass surgery; CHF, congestive heart failure; DBP, Diastolic Blood Pressure; LVH, left ventricular hypertrophy; MI, myocardial infarction; PAD, peripheral artery disease; Q, quintile; SBP, Systolic Blood Pressure; TIA, transient ischemic attack; VIM, variability independent of the mean.

**eTable 9.** Pertinent Baseline Patient Characteristics Across Quintiles of ARV

| Characteristic*                | ARV Quintiles             |                           |                           |                           |                           | Total             | P-value<br>† |
|--------------------------------|---------------------------|---------------------------|---------------------------|---------------------------|---------------------------|-------------------|--------------|
|                                | Q1                        | Q2                        | Q3                        | Q4                        | Q5                        |                   |              |
| <b>N</b>                       | 3035                      | 3120                      | 3066                      | 3073                      | 3069                      | 15363             |              |
| <b>Age, years</b>              | 65.8<br>6<br>(9.6<br>9)   | 65.9<br>6<br>(9.8<br>4)   | 65.9<br>4<br>(9.9<br>1)   | 66.8<br>6<br>(10.<br>00)  | 67.8<br>6<br>(9.8<br>8)   | 66.53<br>(9.92)   | <.000<br>1   |
| <b>BMI, Kg/m<sup>2</sup></b>   | 29.5<br>6<br>(5.6<br>0)   | 29.6<br>4<br>(5.8<br>6)   | 29.7<br>4<br>(5.7<br>4)   | 29.5<br>4<br>(5.8<br>9)   | 29.1<br>7<br>(5.8<br>9)   | 29.53<br>(5.84)   | 0.002        |
| <b>Female</b>                  | 1563<br>(18.<br>92)       | 1646<br>(19.<br>92)       | 1624<br>(19.<br>66)       | 1624<br>(19.<br>66)       | 1805<br>(21.<br>85)       | 8262<br>(53.78)   | <.000<br>1   |
| <b>Race</b>                    |                           |                           |                           |                           |                           |                   |              |
| White                          | 1271<br>(18.<br>26)       | 1409<br>(20.<br>25)       | 1452<br>(20.<br>87)       | 1462<br>(21.<br>01)       | 1365<br>(19.<br>61)       | 6959<br>(45.30)   | <.000<br>1   |
| Black                          | 387<br>(16.<br>70)        | 421<br>(18.<br>16)        | 460<br>(19.<br>84)        | 465<br>(20.<br>06)        | 585<br>(25.<br>24)        | 2318<br>(15.09)   |              |
| Hispanic                       | 1312<br>(23.<br>19)       | 1201<br>(21.<br>23)       | 1061<br>(18.<br>76)       | 1061<br>(18.<br>76)       | 1022<br>(18.<br>07)       | 5657<br>(36.82)   |              |
| Other                          | 65<br>(15.<br>15)         | 89<br>(20.<br>75)         | 93<br>(21.<br>68)         | 85<br>(19.<br>81)         | 97<br>(22.<br>61)         | 429<br>(2.79)     |              |
| <b>Baseline SBP, mm Hg</b>     | 139.<br>42<br>(13.<br>85) | 144.<br>59<br>(15.<br>70) | 148.<br>41<br>(17.<br>56) | 151.<br>63<br>(19.<br>32) | 157.<br>15<br>(21.<br>89) | 148.23<br>(18.90) | <.000<br>1   |
| <b>Baseline DBP, mm Hg</b>     | 83.1<br>1<br>(9.7<br>2)   | 84.5<br>1<br>(10.<br>18)  | 85.4<br>1<br>(11.<br>24)  | 85.5<br>7<br>(11.<br>30)  | 86.6<br>6<br>(12.<br>07)  | 85.00<br>(11.05)  | <.000<br>1   |
| <b>Overall Mean SBP, mm Hg</b> | 134.<br>89<br>(12.<br>25) | 136.<br>63<br>(11.<br>78) | 138.<br>58<br>(12.<br>77) | 141.<br>01<br>(13.<br>18) | 146.<br>72<br>(15.<br>00) | 139.57<br>(13.67) | <.000<br>1   |
| <b>Overall Mean DBP, mm Hg</b> | 80.0<br>1<br>(6.9<br>8)   | 79.9<br>1<br>(7.3<br>7)   | 79.7<br>2<br>(7.7<br>6)   | 80.3<br>0<br>(8.0<br>4)   | 82.1<br>1<br>(9.0<br>4)   | 80.41<br>(7.91)   | <.000<br>1   |
| <b>History of:</b>             |                           |                           |                           |                           |                           |                   |              |
| Diabetes mellitus              | 846                       | 885                       | 909                       | 907                       | 966                       | 4513              | 0.02         |

|                                                 |                     |                     |                     |                     |                     |                 |            |
|-------------------------------------------------|---------------------|---------------------|---------------------|---------------------|---------------------|-----------------|------------|
|                                                 | (18.<br>75)         | (19.<br>61)         | (20.<br>14)         | (20.<br>10)         | (21.<br>40)         | (29.38)         |            |
| Hypercholesterolemia                            | 1636<br>(18.<br>95) | 1712<br>(19.<br>83) | 1775<br>(20.<br>56) | 1779<br>(20.<br>61) | 1731<br>(20.<br>05) | 8633<br>(56.19) | 0.003      |
| Renal insufficiency                             | 40<br>(13.<br>33)   | 55<br>(18.<br>33)   | 60<br>(20.<br>00)   | 50<br>(16.<br>67)   | 95<br>(31.<br>67)   | 300<br>(1.95)   | <.000<br>1 |
| Prior MI                                        | 803<br>(18.<br>19)  | 889<br>(20.<br>14)  | 915<br>(20.<br>73)  | 905<br>(20.<br>50)  | 902<br>(20.<br>43)  | 4414<br>(28.73) | 0.03       |
| CHF                                             | 133<br>(17.<br>78)  | 149<br>(19.<br>92)  | 146<br>(19.<br>52)  | 151<br>(20.<br>19)  | 169<br>(22.<br>59)  | 748<br>(4.87)   | 0.36       |
| Coronary Revascularization<br>(CABG and/or PCI) | 821<br>(18.<br>31)  | 928<br>(20.<br>70)  | 940<br>(20.<br>96)  | 893<br>(19.<br>92)  | 902<br>(20.<br>12)  | 4484<br>(29.19) | 0.03       |
| Evidence of LVH                                 | 406<br>(16.<br>74)  | 464<br>(19.<br>13)  | 485<br>(20.<br>00)  | 513<br>(21.<br>15)  | 557<br>(22.<br>97)  | 2425<br>(15.78) | <.000<br>1 |
| PAD                                             | 310<br>(15.<br>91)  | 382<br>(19.<br>60)  | 398<br>(20.<br>42)  | 411<br>(21.<br>09)  | 448<br>(22.<br>99)  | 1949<br>(12.69) | <.000<br>1 |
| TIA or stroke                                   | 195<br>(17.<br>35)  | 201<br>(17.<br>88)  | 227<br>(20.<br>20)  | 226<br>(20.<br>11)  | 275<br>(24.<br>47)  | 1124<br>(7.32)  | 0.000<br>7 |

eTable 9 displays baseline characteristics across quintiles of SBP ARV.

\* Data are expressed as mean (SD) or n (%) unless otherwise indicated. (%) in rows across quintiles represent row percentages. Frequency missing = 1325.

† P-value from Chi-square or ANOVA tests.

1= Lowest (reference) quintile; 5= Highest quintile.

Abbreviations. ARV, absolute real variability. BMI, body mass index; n, number; CABG, coronary artery bypass surgery; CHF, congestive heart failure; DBP, Diastolic Blood Pressure; LVH, left ventricular hypertrophy; MI, myocardial infarction; PAD, peripheral artery disease; Q, quintile; SBP, Systolic Blood Pressure; TIA, transient ischemic attack.

**eTable 10. Pertinent Baseline Patient Characteristics Across Quintiles of CV**

| Characteristic*                | CV Quintiles              |                           |                           |                           |                           | Total             | P-value<br>† |
|--------------------------------|---------------------------|---------------------------|---------------------------|---------------------------|---------------------------|-------------------|--------------|
|                                | Q1                        | Q2                        | Q3                        | Q4                        | Q5                        |                   |              |
| <b>N</b>                       | 3073                      | 3072                      | 3073                      | 3073                      | 3072                      | 15363             |              |
| <b>Age, years</b>              | 66.1<br>0<br>(9.7<br>1)   | 65.9<br>5<br>(9.9<br>0)   | 66.3<br>3<br>(9.9<br>2)   | 66.7<br>8<br>(10.<br>03)  | 67.3<br>2<br>(9.8<br>4)   | 66.53<br>(9.92)   | <.000<br>1   |
| <b>BMI, Kg/m<sup>2</sup></b>   | 29.7<br>5<br>(5.6<br>9)   | 29.8<br>8<br>(5.9<br>4)   | 29.5<br>3<br>(5.6<br>3)   | 29.4<br>6<br>(5.7<br>1)   | 29.0<br>1<br>(5.9<br>8)   | 29.53<br>(5.84)   | <.000<br>1   |
| <b>Female</b>                  | 1579<br>(19.<br>11)       | 1609<br>(19.<br>47)       | 1585<br>(19.<br>18)       | 1698<br>(20.<br>55)       | 1791<br>(21.<br>68)       | 8262<br>(53.78)   | <.000<br>1   |
| <b>Race</b>                    |                           |                           |                           |                           |                           |                   |              |
| White                          | 1411<br>(20.<br>28)       | 1410<br>(20.<br>26)       | 1418<br>(20.<br>38)       | 1381<br>(19.<br>84)       | 1339<br>(19.<br>24)       | 6959<br>(45.30)   | 0.34         |
| Black                          | 455<br>(19.<br>63)        | 462<br>(19.<br>93)        | 457<br>(19.<br>72)        | 474<br>(20.<br>45)        | 470<br>(20.<br>28)        | 2318<br>(15.09)   |              |
| Hispanic                       | 1135<br>(20.<br>06)       | 1124<br>(19.<br>87)       | 1114<br>(19.<br>69)       | 1114<br>(19.<br>69)       | 1170<br>(20.<br>68)       | 5657<br>(36.82)   |              |
| Other                          | 72<br>(16.<br>78)         | 76<br>(17.<br>72)         | 84<br>(19.<br>58)         | 104<br>(24.<br>24)        | 93<br>(21.<br>68)         | 429<br>(2.79)     |              |
| <b>Baseline SBP, mm Hg</b>     | 140.<br>01<br>(14.<br>38) | 143.<br>18<br>(15.<br>42) | 146.<br>76<br>(16.<br>31) | 151.<br>31<br>(18.<br>02) | 159.<br>98<br>(22.<br>42) | 148.23<br>(18.90) | <.000<br>1   |
| <b>Baseline DBP, mm Hg</b>     | 82.8<br>5<br>(9.6<br>7)   | 83.8<br>9<br>(10.<br>45)  | 84.6<br>9<br>(10.<br>72)  | 85.8<br>0<br>(11.<br>22)  | 88.0<br>7<br>(12.<br>07)  | 85.00<br>(11.05)  | <.000<br>1   |
| <b>Overall Mean SBP, mm Hg</b> | 138.<br>01<br>(13.<br>65) | 138.<br>08<br>(13.<br>42) | 138.<br>71<br>(12.<br>86) | 140.<br>62<br>(13.<br>40) | 142.<br>42<br>(14.<br>45) | 139.57<br>(13.67) | <.000<br>1   |
| <b>Overall Mean DBP, mm Hg</b> | 81.5<br>5<br>(7.4<br>4)   | 80.7<br>2<br>(7.4<br>8)   | 80.4<br>5<br>(7.7<br>6)   | 80.1<br>9<br>(8.0<br>2)   | 79.1<br>4<br>(8.6<br>2)   | 80.41<br>(7.91)   | <.000<br>1   |
| <b>History of:</b>             |                           |                           |                           |                           |                           |                   |              |
| Diabetes mellitus              | 880                       | 895                       | 927                       | 907                       | 904                       | 4513              | 0.76         |

|                                              |                 |                 |                 |                 |                 |                 |        |
|----------------------------------------------|-----------------|-----------------|-----------------|-----------------|-----------------|-----------------|--------|
|                                              | (19.50)         | (19.83)         | (20.54)         | (20.10)         | (20.03)         | (29.38)         |        |
| Hypercholesterolemia                         | 1698<br>(19.67) | 1764<br>(20.43) | 1758<br>(20.36) | 1719<br>(19.91) | 1694<br>(19.62) | 8633<br>(56.19) | 0.22   |
| Renal insufficiency                          | 51<br>(17.00)   | 52<br>(17.33)   | 58<br>(19.33)   | 65<br>(21.67)   | 74<br>(24.67)   | 300<br>(1.95)   | 0.18   |
| Prior MI                                     | 898<br>(20.34)  | 874<br>(19.80)  | 872<br>(19.76)  | 902<br>(20.43)  | 868<br>(19.66)  | 4414<br>(28.73) | 0.81   |
| CHF                                          | 158<br>(21.12)  | 137<br>(18.32)  | 157<br>(20.99)  | 140<br>(18.72)  | 156<br>(20.86)  | 748<br>(4.87)   | 0.57   |
| Coronary Revascularization (CABG and/or PCI) | 914<br>(20.38)  | 949<br>(21.16)  | 931<br>(20.76)  | 877<br>(19.56)  | 813<br>(18.13)  | 4484<br>(29.19) | 0.001  |
| Evidence of LVH                              | 469<br>(19.34)  | 446<br>(18.39)  | 489<br>(20.16)  | 492<br>(20.29)  | 529<br>(21.81)  | 2425<br>(15.78) | 0.06   |
| PAD                                          | 332<br>(17.03)  | 346<br>(17.03)  | 418<br>(17.03)  | 420<br>(17.03)  | 433<br>(17.03)  | 1949<br>(12.69) | <.0001 |
| TIA or stroke                                | 211<br>(18.77)  | 202<br>(17.97)  | 234<br>(20.82)  | 224<br>(19.93)  | 253<br>(22.51)  | 1124<br>(7.32)  | 0.11   |

eTable 10 displays baseline characteristics across quintiles of SBP CV.

\* Data are expressed as mean (SD) or n (%) unless otherwise indicated. (%) in rows across quintiles represent row percentages. Frequency missing = 1325.

† P-value from Chi-square or ANOVA tests.

1= Lowest (reference) quintile; 5= Highest quintile.

Abbreviations. BMI, body mass index; n, number; CABG, coronary artery bypass surgery; CHF, congestive heart failure; CV, coefficient of variation; DBP, Diastolic Blood Pressure; LVH, left ventricular hypertrophy; MI, myocardial infarction; PAD, Q, quintile; peripheral artery disease; SBP, Systolic Blood Pressure; TIA, transient ischemic attack.

**eTable 11. Pertinent Baseline Patient Characteristics Across Quintiles of SD**

| Characteristic*                | SD Quintiles              |                           |                           |                           |                           | Total             | P-value<br>† |
|--------------------------------|---------------------------|---------------------------|---------------------------|---------------------------|---------------------------|-------------------|--------------|
|                                | Q1                        | Q2                        | Q3                        | Q4                        | Q5                        |                   |              |
| <b>N</b>                       | 3074                      | 3071                      | 3073                      | 3073                      | 3072                      | 15363             |              |
| <b>Age, years</b>              | 66.0<br>4<br>(9.7<br>3)   | 65.5<br>7<br>(9.7<br>9)   | 66.3<br>6<br>(9.9<br>9)   | 66.7<br>6<br>(9.9<br>4)   | 67.7<br>5<br>(9.8<br>8)   | 66.53<br>(9.92)   | <.000<br>1   |
| <b>BMI, Kg/m<sup>2</sup></b>   | 29.6<br>3<br>(5.6<br>6)   | 29.9<br>1<br>(5.7<br>9)   | 29.4<br>8<br>(5.7<br>7)   | 29.5<br>6<br>(5.8<br>1)   | 29.0<br>5<br>(5.9<br>2)   | 29.53<br>(5.84)   | <.000<br>1   |
| <b>Female</b>                  | 1561<br>(18.<br>89)       | 1606<br>(19.<br>44)       | 1605<br>(19.<br>43)       | 1668<br>(20.<br>19)       | 1822<br>(22.<br>05)       | 8262<br>(53.78)   | <.000<br>1   |
| <b>Race</b>                    |                           |                           |                           |                           |                           |                   |              |
| White                          | 1382<br>(19.<br>86)       | 1416<br>(20.<br>35)       | 1432<br>(20.<br>58)       | 1374<br>(19.<br>74)       | 1355<br>(19.<br>47)       | 6959<br>(45.30)   | 0.000<br>7   |
| Black                          | 416<br>(17.<br>95)        | 464<br>(20.<br>02)        | 423<br>(18.<br>25)        | 503<br>(21.<br>70)        | 512<br>(22.<br>09)        | 2318<br>(15.09)   |              |
| Hispanic                       | 1210<br>(21.<br>39)       | 1107<br>(19.<br>57)       | 1131<br>(19.<br>99)       | 1101<br>(19.<br>46)       | 1108<br>(19.<br>59)       | 5657<br>(36.82)   |              |
| Other                          | 66<br>(15.<br>38)         | 84<br>(19.<br>58)         | 87<br>(20.<br>28)         | 95<br>(22.<br>14)         | 97<br>(22.<br>61)         | 429<br>(2.79)     |              |
| <b>Baseline SBP, mm Hg</b>     | 137.<br>67<br>(13.<br>62) | 141.<br>54<br>(14.<br>27) | 146.<br>64<br>(15.<br>15) | 152.<br>26<br>(17.<br>07) | 163.<br>15<br>(21.<br>74) | 148.23<br>(18.90) | <.000<br>1   |
| <b>Baseline DBP, mm Hg</b>     | 82.8<br>(9.5<br>3)        | 83.4<br>3<br>(10.<br>23)  | 84.7<br>7<br>(10.<br>42)  | 86.3<br>1<br>(11.<br>40)  | 88.5<br>9<br>(12.<br>06)  | 85.00<br>(11.05)  | <.000<br>1   |
| <b>Overall Mean SBP, mm Hg</b> | 135.<br>56<br>(12.<br>93) | 136.<br>26<br>(12.<br>29) | 138.<br>13<br>(12.<br>23) | 141.<br>18<br>(12.<br>79) | 146.<br>72<br>(14.<br>86) | 139.57<br>(13.67) | <.000<br>1   |
| <b>Overall Mean DBP, mm Hg</b> | 80.1<br>1<br>(7.4<br>1)   | 79.4<br>6<br>(7.4<br>8)   | 79.7<br>0<br>(7.6<br>7)   | 80.6<br>4<br>(8.0<br>0)   | 82.1<br>2<br>(8.6<br>6)   | 80.41<br>(7.91)   | <.000<br>1   |
| <b>History of:</b>             |                           |                           |                           |                           |                           |                   |              |
| Diabetes mellitus              | 867                       | 901                       | 900                       | 919                       | 926                       | 4513              | 0.50         |

|                                                 |                     |                     |                     |                     |                     |                 |            |
|-------------------------------------------------|---------------------|---------------------|---------------------|---------------------|---------------------|-----------------|------------|
|                                                 | (19.<br>21)         | (19.<br>96)         | (19.<br>94)         | (20.<br>36)         | (20.<br>52)         | (29.38)         |            |
| Hypercholesterolemia                            | 1692<br>(19.<br>60) | 1786<br>(20.<br>69) | 1736<br>(20.<br>11) | 1737<br>(20.<br>12) | 1682<br>(19.<br>48) | 8633<br>(56.19) | 0.05       |
| Renal insufficiency                             | 41<br>(13.<br>67)   | 62<br>(20.<br>67)   | 53<br>(17.<br>67)   | 62<br>(20.<br>67)   | 82<br>(27.<br>33)   | 300<br>(1.95)   | 0.004      |
| Prior MI                                        | 888<br>(20.<br>12)  | 898<br>(20.<br>34)  | 860<br>(19.<br>48)  | 874<br>(19.<br>80)  | 894<br>(20.<br>25)  | 4414<br>(28.73) | 0.81       |
| CHF                                             | 154<br>(20.<br>59)  | 150<br>(20.<br>05)  | 148<br>(19.<br>79)  | 146<br>(19.<br>52)  | 150<br>(20.<br>05)  | 748<br>(4.87)   | 0.99       |
| Coronary Revascularization<br>(CABG and/or PCI) | 899<br>(20.<br>05)  | 980<br>(21.<br>86)  | 904<br>(20.<br>16)  | 872<br>(19.<br>45)  | 829<br>(18.<br>49)  | 4484<br>(29.19) | 0.000<br>7 |
| Evidence of LVH                                 | 464<br>(19.<br>13)  | 435<br>(17.<br>94)  | 488<br>(20.<br>12)  | 493<br>(20.<br>33)  | 545<br>(22.<br>47)  | 2425<br>(15.78) | 0.003      |
| PAD                                             | 331<br>(16.<br>98)  | 362<br>(18.<br>57)  | 420<br>(21.<br>55)  | 405<br>(20.<br>78)  | 431<br>(22.<br>11)  | 1949<br>(12.69) | 0.000<br>3 |
| TIA or stroke                                   | 207<br>(18.<br>42)  | 206<br>(18.<br>33)  | 227<br>(20.<br>20)  | 213<br>(18.<br>95)  | 271<br>(24.<br>11)  | 1124<br>(7.32)  | 0.007      |

eTable 11 displays baseline characteristics across quintiles of SBP SD.

\* Data are expressed as mean (SD) or n (%) unless otherwise indicated. (%) in rows across quintiles represent row percentages. Frequency missing = 1325.

† *P*-value from Chi-square or ANOVA tests.

1= Lowest (reference) quintile; 5= Highest quintile.

Abbreviations. BMI, body mass index; n, number; CABG, coronary artery bypass surgery; CHF, congestive heart failure; DBP, Diastolic Blood Pressure; LVH, left ventricular hypertrophy; MI, myocardial infarction; PAD, peripheral artery disease; Q, quintile; SBP, Systolic Blood Pressure; SD, standard deviation; TIA, transient ischemic attack.



**eTable 12.** Cochran-Armitage Test for Trend Across Blood Pressure Variability Quintiles

|               | <i>P</i> for trend* |        |
|---------------|---------------------|--------|
|               | SBP                 | DBP    |
| VIM quintiles | <.0001              | <.0001 |
| ARV quintiles | <.0001              | <.0001 |
| CV quintiles  | <.0001              | <.0001 |
| SD quintiles  | <.0001              | 0.074  |

\*2-sided *P*-value from Cochran-Armitage test for trend testing a binary outcome variable (death).

Abbreviations. ARV, average real variability; CV, coefficient of variation; DBP, diastolic blood pressure; SBP, systolic blood pressure; SD, standard deviation; VIM, variability independent of the mean.

### eBox. Blood Pressure Variability Equations

$$ARV = \frac{1}{n-1} \sum_{i=1}^{n-1} |BP_{i+1} - BP_i|$$

$$VIM = \frac{SD}{\overline{BP^x}} \times \overline{BP_{Pop}^x}$$

$$CV = \frac{SD}{\overline{BP}}$$

$$SD = \sqrt{\frac{\sum (BP_i - \overline{BP})^2}{n-1}}$$

Abbreviations. ARV, average real variability; BP, blood pressure; CV, coefficient of variation; SD, standard deviation; VIM, variability independent of the mean.

BP pop = Population mean blood pressure.

i = represent the ith BP measurement or the Blood Pressure at the ith visit.

x = the power imputed from non-linear regression

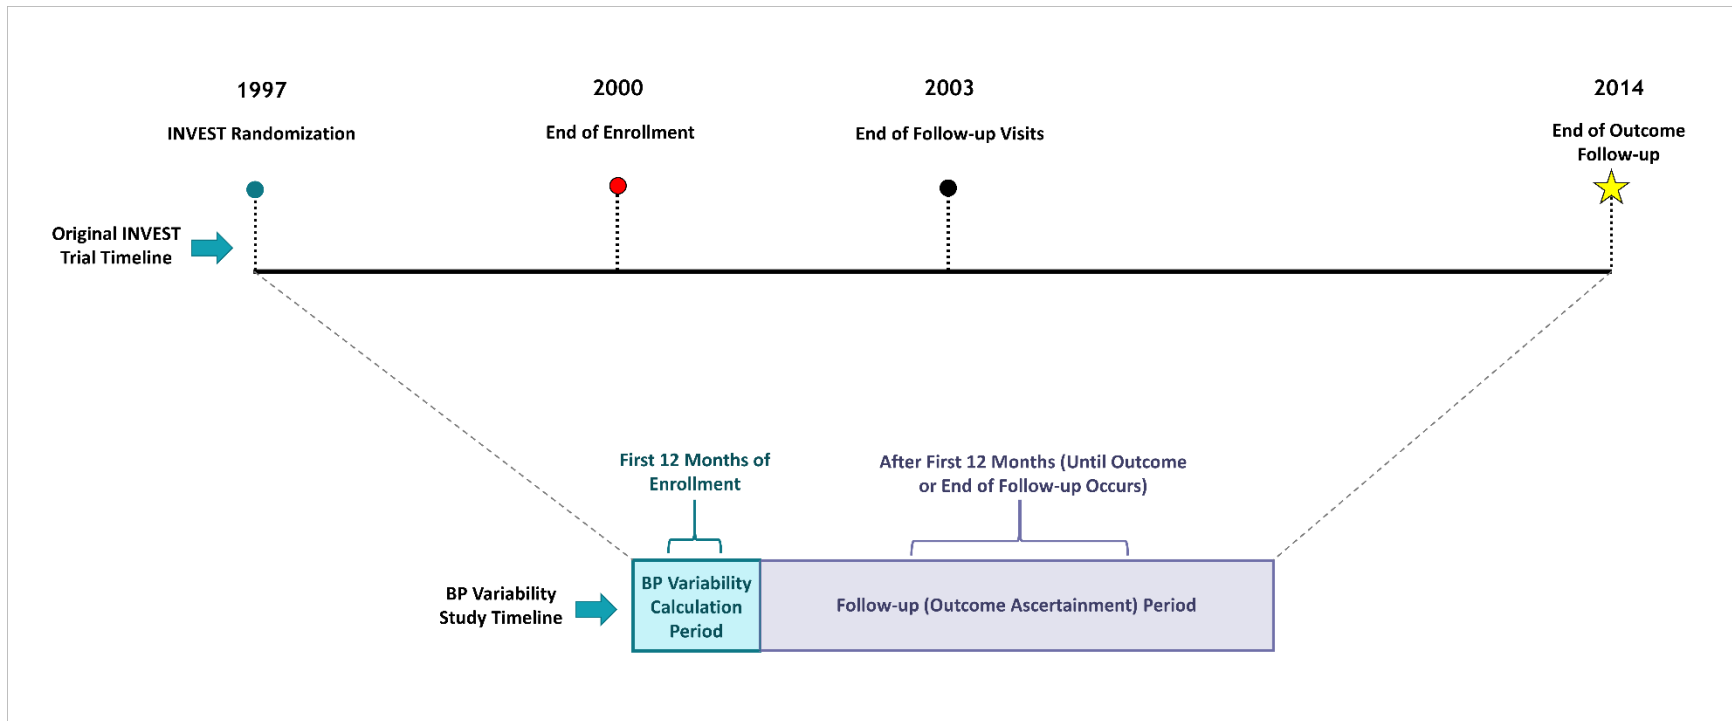

**eFigure 1. Study Timeline**

The upper line illustrates the Original INVEST study timeline from randomization to end of follow-up visits. In 2014, a National Death Index query was requested. The lower line illustrates the current study timeline including blood pressure ascertainment period (1<sup>st</sup> year of enrollment).

Abbreviations. BP, blood pressure; INVEST, INternational VERapamil SR-Trandolapril Study.

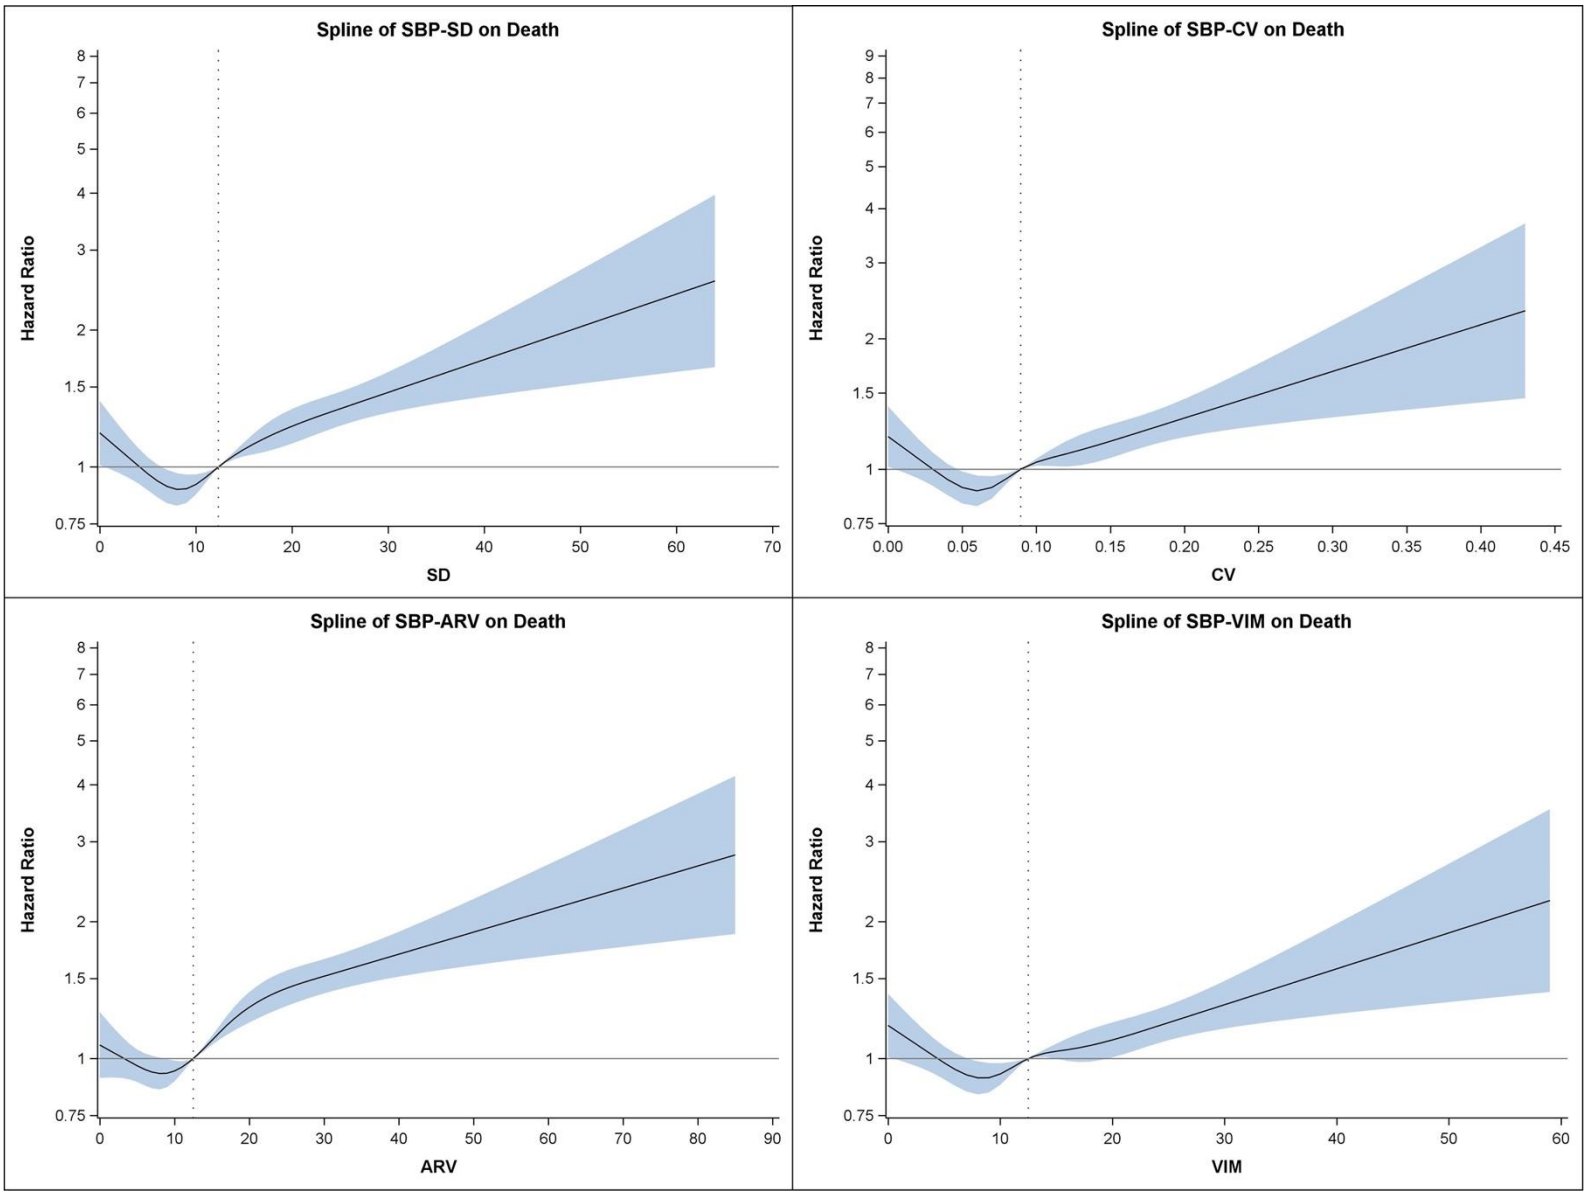

**eFigure 2.** Spline Curves of Systolic Blood Pressure Variability Measures on Primary Outcome

Spline curves demonstrating the association between each systolic blood pressure variability measures modeled as a continuous variable with the primary outcome (unadjusted), using Cox proportional hazard models and restricted quadratic splines with knots at 5th, 27.5th, 50th, 72.5th, 95th percentiles of each BP variability measure.

Abbreviations. ARV, average real variability; SBP, systolic blood pressure; CV, coefficient of variation; SD, standard deviation; VIM, variability independent of the mean.

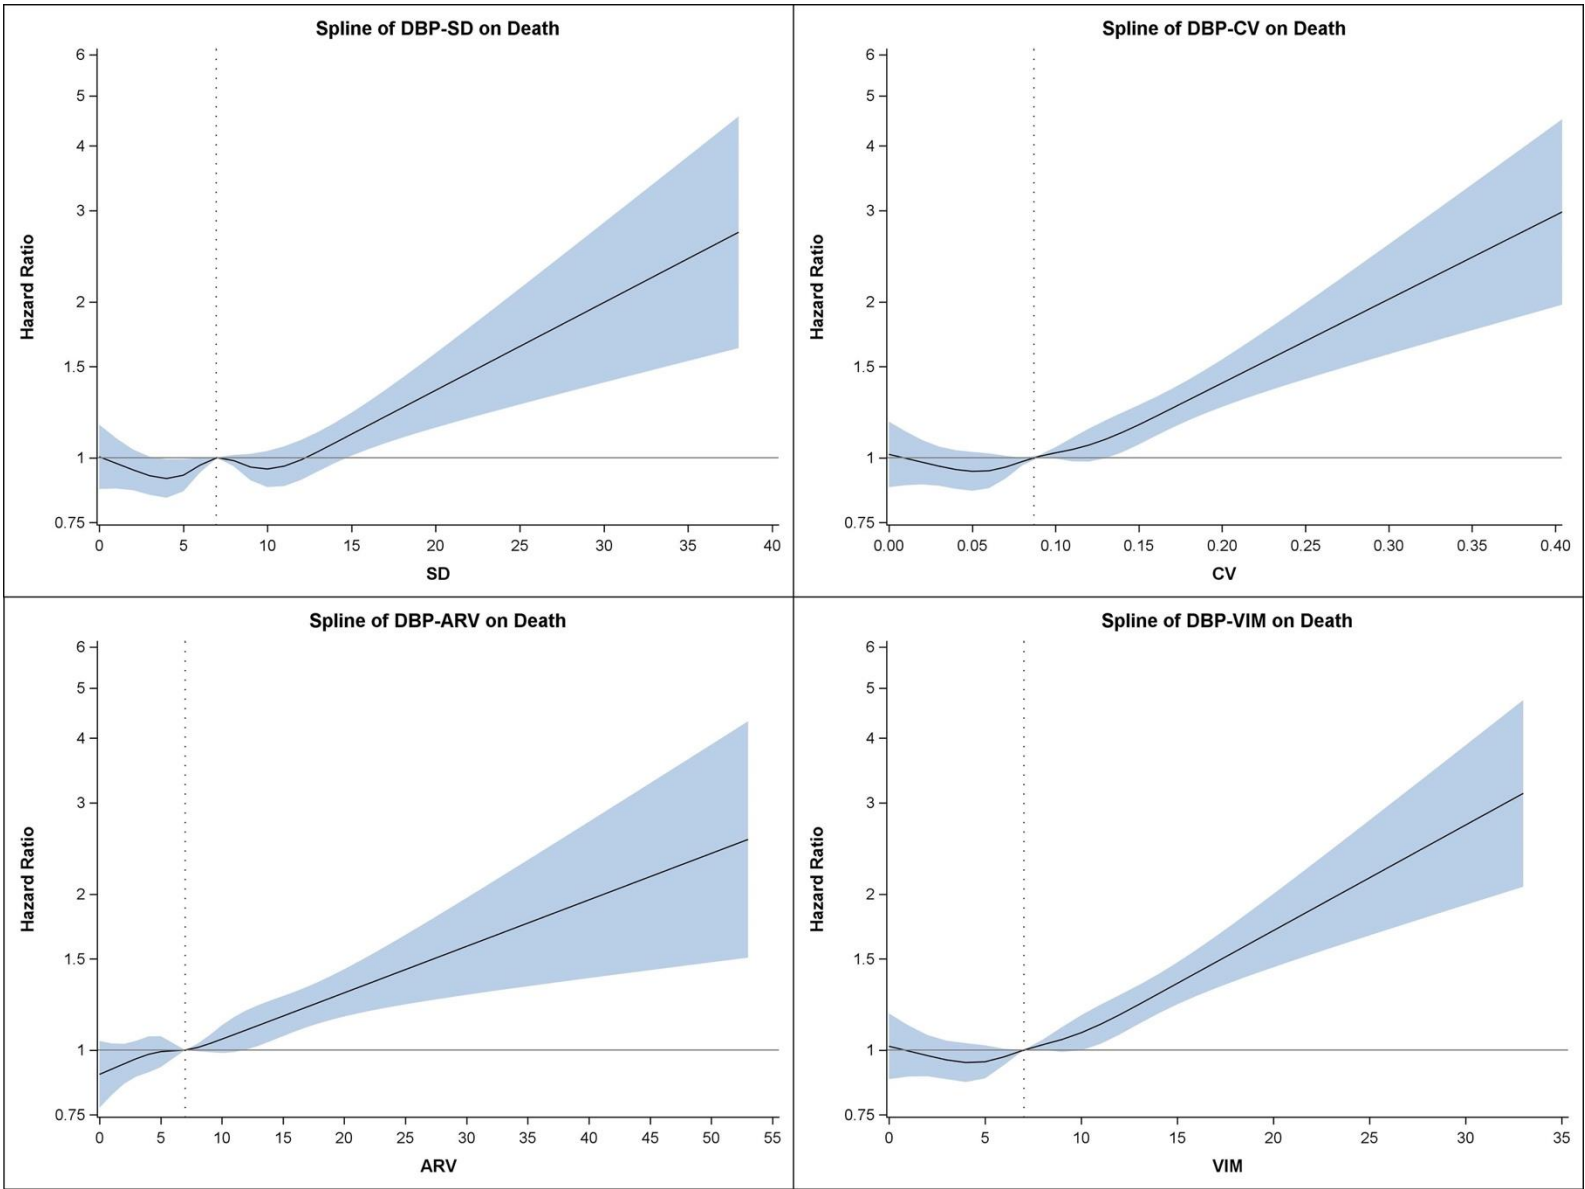

**eFigure 3.** Spline Curves of Diastolic Blood Pressure Variability Measures on Primary Outcome

Spline curves demonstrating the association between each diastolic blood pressure variability measures as a continuous variable with the primary outcome (unadjusted) using Cox proportional hazard models and restricted quadratic splines with knots at 5th, 27.5th, 50th, 72.5th, 95th percentiles of each BP variability measure.

Abbreviations. ARV, average real variability; SBP, systolic blood pressure; CV, coefficient of variation; SD, standard deviation; VIM, variability independent of the mean.

**eFigure 4.** Schematic Diagram of Implementing BP Variability Calculation in Clinical Practice

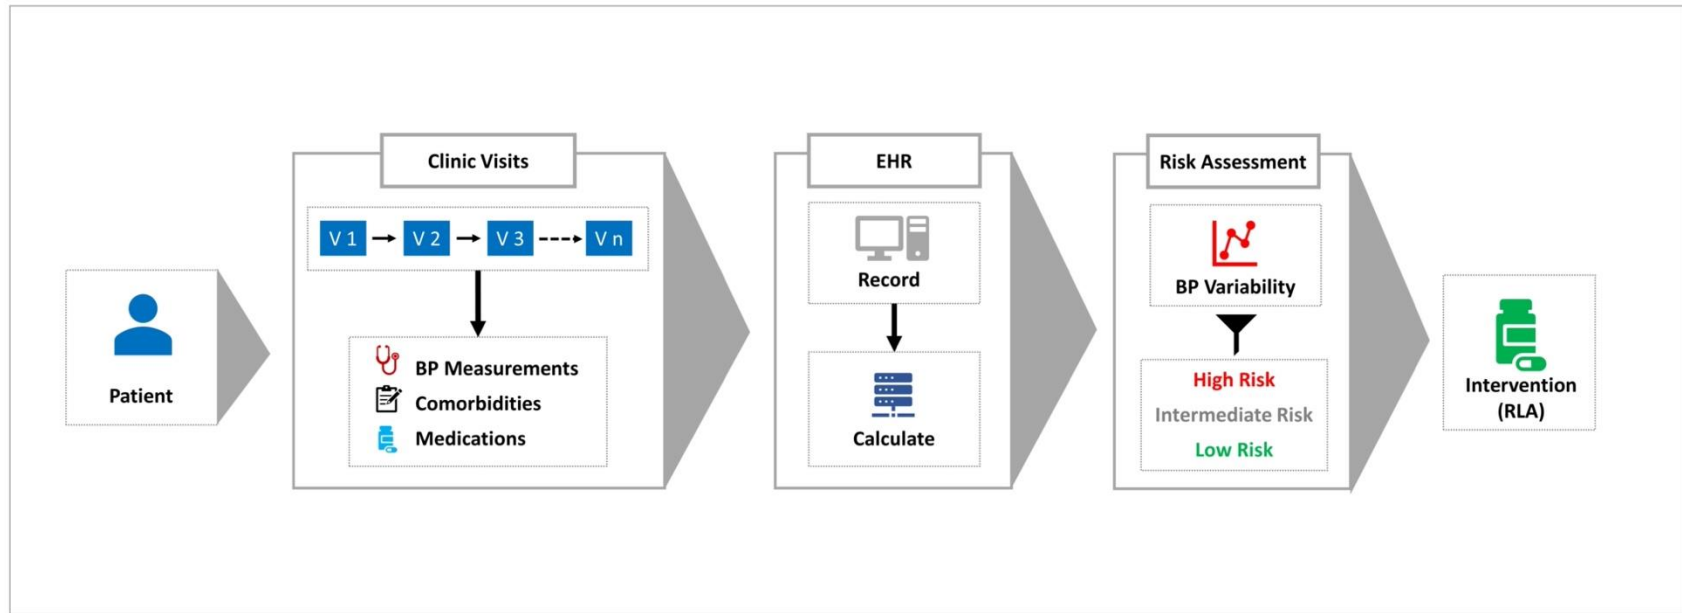

With electronic medical records, blood pressures over several visits can easily be analyzed for multiple blood pressure variability measures. Using pertinent patients' demographics and possibly medications, prediction models can be developed to evaluate the excess risk and long-term outcomes that are related to higher blood pressure variability. Once risk is assessed, patients can be divided into three risk groups: "high", "intermediate" and "low" for risk lowering approach (RLA). High risk patients would require "greatly accelerated" RLA, i.e., intensive medical management. Moderate risk patients require "modest acceleration" in RLA, while low risk patients can maintain usual care but with continued follow-up to periodically reassess risk. Gaps in knowledge still exist on what interventions should be triggered when high variability is detected (i.e., change in medications, increased surveillance, more aggressive primary prevention measures...etc.).

Abbreviations. BP, blood pressure; EHR, electronic health record; RLA, risk lowering approach; V, visit.
